# Supplementary material
Source: Springer Nature journal article supplement (https://www.springermedizin.de/resource/supplementary/12985_2014_2488_MOESM11_ESM.pdf/9606862)

# Brainstem-Cerebellum

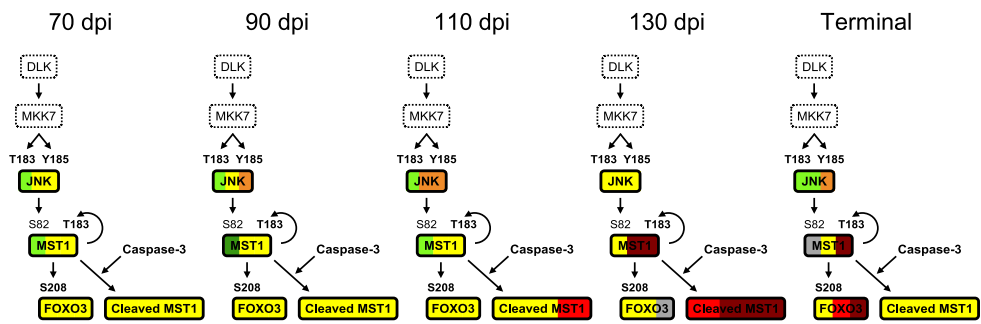

Phosphorylation Level (expression level of cleaved MST1)

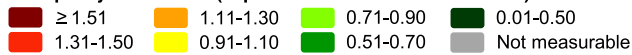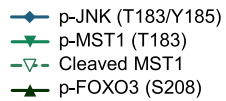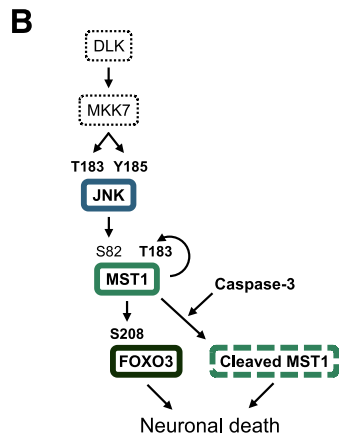

## Brainstem-Cerebellum

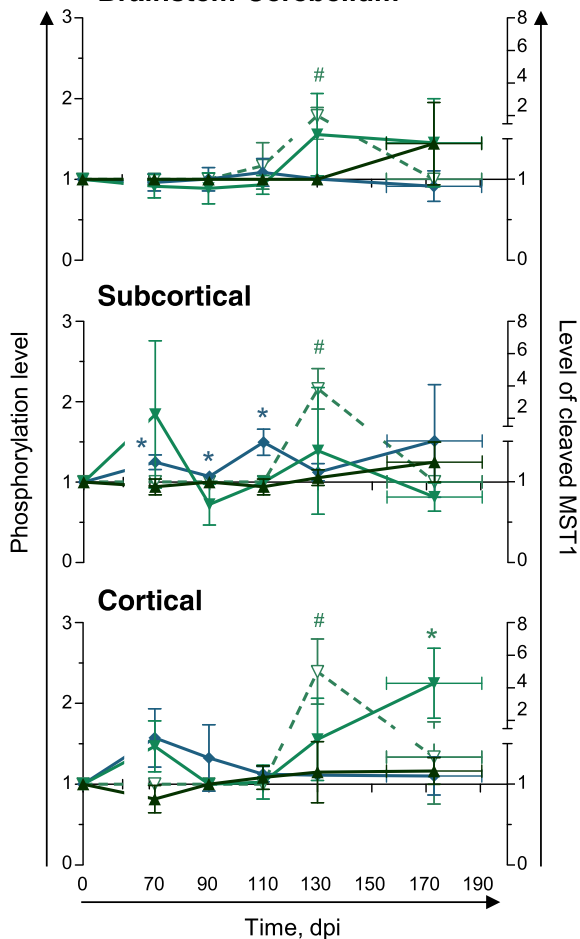

Supplement: MOESM11 [file 9606862]
